# Supplementary material for: Long COVID and episodic disability: advancing the conceptualisation, measurement and knowledge of episodic disability among people living with Long COVID – protocol for a mixed-methods study
Source: PubMed Central journal article supplement — BMJ Open. 2022 Mar 6;12(3):e060826. doi: 10.1136/bmjopen-2022-060826 (PMC8905414; doi:10.1136/bmjopen-2022-060826), 2022-03-06
Supplement: bmjopen-2022-060826.reviewer_comments.pdf [file bmjopen-2022-060826.reviewer_comments.pdf]

## PEER REVIEW HISTORY

BMJ Open publishes all reviews undertaken for accepted manuscripts. Reviewers are asked to complete a checklist review form (<http://bmjopen.bmj.com/site/about/resources/checklist.pdf>) and are provided with free text boxes to elaborate on their assessment. These free text comments are reproduced below.

## ARTICLE DETAILS

|                            |                                                                                                                                                                                                                                                                                                                                                                                        |
|----------------------------|----------------------------------------------------------------------------------------------------------------------------------------------------------------------------------------------------------------------------------------------------------------------------------------------------------------------------------------------------------------------------------------|
| <b>TITLE (PROVISIONAL)</b> | Long COVID and Episodic Disability: Advancing the Conceptualization, Measurement and Knowledge of Episodic Disability among People Living with Long COVID: Protocol for a Mixed Methods Study                                                                                                                                                                                          |
| <b>AUTHORS</b>             | O'Brien, Kelly; Brown, Darren; Bergin, Colm; Erlandson, Kristine M; Vera, Jaime; Avery, Lisa; Carusone, Soo Chan; Cheung, Angela; Goulding, Susie; Harding, Richard; McCorkell, Lisa; O'Hara, Margaret; Robinson, Larry; Thomson, Catherine; Wei, Hannah; St. Clair-Sullivan, Natalie; Torres, Brittany; Bannan, Ciaran; Roche, Niamh; Stokes, Ruth; Gayle, Patriic; Solomon, Patricia |

This article was not externally reviewed at BMJ Open. Protocols that have been independently assessed prior to submission to BMJ Open are usually fast-tracked to publication on the grounds that further substantial changes will not be possible. This independent assessment will usually be external, independent review for both a substantial grant award from a non-commercial or government funder and ethics approval.
